# Supplementary material for: Effectiveness and Acceptance of Technology-Based Psychological Interventions for the Acute Treatment of Unipolar Depression: Systematic Review and Meta-analysis
Source: PubMed Central journal article supplement (PMC8386371; doi:10.2196/24584), 2021-06-13
Supplement: jmir_v23i6e24584_app1.pdf [file jmir_v23i6e24584_app1.pdf]

**Appendix 1.** Summary of results sorted by format of implementation of TBIs

|                                                                                                                                             | Outcomes                                 |                                  |            |
|---------------------------------------------------------------------------------------------------------------------------------------------|------------------------------------------|----------------------------------|------------|
| Comparisons                                                                                                                                 | Post-treatment<br>Depression<br>severity | Follow-up<br>Depression severity | Dropouts   |
| <b>TBIs as stand-alone interventions</b>                                                                                                    |                                          |                                  |            |
| TBI vs f2f treatment (n=6)                                                                                                                  | N.S.                                     | N.S.                             | N.S.       |
| TBI vs Treatment as usual (n=12)                                                                                                            | Favours TBI group*                       | Favours TBI group                | No data    |
| TBI vs attention placebo (n=12)                                                                                                             | Favours TBI group*                       | Favours TBI group                | N.S.*      |
| TBI vs waiting list (n=20)                                                                                                                  | Favours TBI group*                       | Favours TBI group*               | N.S.       |
| TBI vs no-treatment control (n=3)                                                                                                           | N.S.*                                    | No data                          | N.S.**     |
| TBI vs TBI (n=21)                                                                                                                           | Not pooled                               | Not pooled                       | Not pooled |
| Other comparisons (n=2)                                                                                                                     | Not pooled                               | Not pooled                       | Not pooled |
| <b>TBIs within blended treatments</b>                                                                                                       |                                          |                                  |            |
| Non-inferiority trials (n=3)                                                                                                                | N.S.                                     | N.S.                             | N.S.*      |
| Superiority trials (n=8)                                                                                                                    | Favours TBI group*                       | N.S.                             | No data    |
| <b>TBIs within collaborative care approaches</b>                                                                                            |                                          |                                  |            |
| Collaborative care trials with TBIs vs usual care (n=3)                                                                                     | Favours TBI group                        | Favours TBI group                | No data    |
| <b>TBIs within stepped care approaches</b>                                                                                                  |                                          |                                  |            |
| TBI vs waiting list as a first step in a stepped care approach (n=1); Stepped care approach incorporating different TBIs vs TBI alone (n=1) | Not pooled                               | Not pooled                       | Not pooled |

**Note.** N.S. = not statistically significant; TBI = technology-based psychological intervention; \*substantial statistical heterogeneity ( $I^2 \geq 50\%$ ); \*\*results are based on data from one study.
