# Supplementary material for: Effectiveness and Acceptance of Technology-Based Psychological Interventions for the Acute Treatment of Unipolar Depression: Systematic Review and Meta-analysis
Source: PubMed Central journal article supplement (PMC8386371; doi:10.2196/24584), 2021-06-13
Supplement: jmir_v23i6e24584_app2.pdf [file jmir_v23i6e24584_app2.pdf]

**Appendix 2.** Characteristics of included studies (N = 78).

| Study ID (Author / year / reference) | N   | Study arms                                                                                        | Implementation in mental health care | Age – M (SD) | Sex (% of females) | Depression Diagnosis                                                                                        | Applied technologies                                                          | Interventions' duration (in weeks) and planned number of modules / sessions | Therapeutic rationale of TBIs |
|--------------------------------------|-----|---------------------------------------------------------------------------------------------------|--------------------------------------|--------------|--------------------|-------------------------------------------------------------------------------------------------------------|-------------------------------------------------------------------------------|-----------------------------------------------------------------------------|-------------------------------|
| Agyapong (2017) [22]                 | 73  | 1) Supportive text messages<br>2) control text messages                                           | Stand-alone intervention             | ND           | 68.5               | MDD                                                                                                         | Internet application on mobile phone                                          | 13,05 weeks / two text messages per day for 90 days                         | CBT                           |
| Andersson (2013) [23]                | 69  | 1) Internet-based cognitive behavioral therapy<br>2) in-person group cognitive behavioral therapy | Stand-alone intervention             | 42.3 (13.5)  | 78.3               | MDD (71.0% in recurrent episode, 1.5% in single episode, Dysthymia (6.0%), MDD plus dysthymia 21.7%)        | Internet-delivered text modules                                               | 8 weeks / 7 modules                                                         | CBT                           |
| Arjadi (2018) [24]                   | 313 | 1) Internet-based behavioral activation intervention<br>2) Online psychoeducation                 | Stand-alone intervention             | ND           | 80.8               | MDD (mild (24.2%), moderate (31.2%), severe 40.90%, based on PHQ-9)                                         | Online program (accessible via computer or mobile device) + telephone support | ND / 8 modules                                                              | BA                            |
| Berger (2011)* [25]                  | 76  | 1) Guided internet-based CBT<br>2) unguided internet-based CBT<br>3) waiting list                 | Stand-alone intervention             | 38.8 (14.0)  | 69.7               | MDD, Dysthymia (9.2%); MDD severity (mild (22.4%), moderate (60.5%), severe (7.9%), based on BDI-II scores) | 1), 2) Online intervention                                                    | 10 weeks / 11 modules                                                       | 1), 2) CBT                    |

|                       |     |                                                                                                                                              |                                   |             |      |                                                                                                                                                                                  |                                                                                    |                                    |                                                              |
|-----------------------|-----|----------------------------------------------------------------------------------------------------------------------------------------------|-----------------------------------|-------------|------|----------------------------------------------------------------------------------------------------------------------------------------------------------------------------------|------------------------------------------------------------------------------------|------------------------------------|--------------------------------------------------------------|
| Berger (2018) [26]    | 98  | 1) regular f2f psychotherapy plus internet-based CBT (Deprexis)<br>2) regular f2f psychotherapy                                              | Blended treatment                 | 43.1 (12.0) | 66.3 | (ICD-10; F32.- Depressive Episode, F33.- Recurrent Depressive Disorder, F34.- Persistent Affective Disorder, F38.- Other Affective Disorder, F39 Unspecified Affective Disorder) | Online program                                                                     | 12 weeks (length of Deprexis) / ND | CBT                                                          |
| Blackwell (2015) [27] | 150 | 1) imagery cognitive bias modification<br>2) control condition (without training contingency, which was provided for other intervention arm) | Stand-alone intervention          | ND          | 68.7 | MDD                                                                                                                                                                              | Online program (access via web browser)                                            | 4 weeks / 12 sessions              | CBM                                                          |
| Bowers (1993) [28]    | 22  | 1) TAU<br>2) TAU plus therapist delivered CBT<br>3) TAU plus computer assisted CBT                                                           | Blended treatment                 | ND          | 68.2 | MDD                                                                                                                                                                              | 3) Computer program                                                                | ND / 8 sessions                    | CBT                                                          |
| Carlbring (2013) [29] | 80  | 1) Computer-administered therapy<br>2) waiting list                                                                                          | Stand-alone intervention          | 44.5 (13.5) | 82.5 | MDD                                                                                                                                                                              | 1) Online intervention, CD-ROM (mindfulness and acceptance instructions exercises) | 8 weeks / 7 modules                | 1) BA with influences from acceptance and commitment therapy |
| Celano (2017) [30]    | 65  | 1) Positive psychology<br>2) cognition focused condition                                                                                     | Enhanced stand-alone intervention | ND          | 69.2 | MDD                                                                                                                                                                              | Telephone                                                                          | 6 weeks / 6 sessions               | PP, CF (cognition focused emotionally neutral memory recall) |
| Choi (2012) [31]      | 63  | 1) Internet-based CBT (attuned to Chinese people                                                                                             | Stand-alone intervention          | 39.0 (11.7) | 80   | MDD                                                                                                                                                                              | 1) Online intervention, telephone (for                                             | 8 weeks / 6 online                 | 1) CBT                                                       |

|                      |     |                                                                                                                                                                                                                                                             |                                   |            |      |                                                                 |                                 |                                          |                                                                                        |
|----------------------|-----|-------------------------------------------------------------------------------------------------------------------------------------------------------------------------------------------------------------------------------------------------------------|-----------------------------------|------------|------|-----------------------------------------------------------------|---------------------------------|------------------------------------------|----------------------------------------------------------------------------------------|
|                      |     | with depression living in Australia)<br>2) waiting list                                                                                                                                                                                                     |                                   |            |      |                                                                 | supporting contacts)            |                                          |                                                                                        |
| Choi (2014) [32]     | 158 | 1) Videoconferencing problem solving therapy, 2) face-to-face problem solving therapy 3) telephone support calls                                                                                                                                            | Stand-alone intervention          | 64.8 (9.2) | 78.5 | MDD (65.2%), depressive disorder, NOS (29.7%), dysthymia (5.1%) | 1) Laptop (Skype), 3) telephone | ND / 6 sessions                          | 1) Problem solving therapy, 3) no specific rationale applied                           |
| Corruble (2016) [33] | 221 | 1) Social rhythm therapy plus face-to-face treatment with a psychiatrist and antidepressant medication<br>2) clinical management plus face-to-face treatment with a psychiatrist and antidepressant medication<br>3) TAU (posteriori matched control group) | Blended treatment                 | ND         | ND   | MDD                                                             | 1), 2) Telephone                | 1) 8 weeks / 8 sessions, 2) 8 weeks / ND | 1) Social rhythm therapy, 2) Intensive clinical management (as described in the paper) |
| Dennis (2020) [35]   | 241 | 1) Telephone interpersonal psychotherapy + locally available standard postpartum care (including postpartum depression service), 2) locally available standard postpartum care                                                                              | Enhanced stand-alone intervention | ND         | 100  | MDD (postpartum)                                                | 1) Telephone-delivered          | 12 weeks / 12 modules                    | 1) IPT                                                                                 |

|                      |     |                                                                                                                                         |                                   |               |       |                                                                                                 |                                                               |                                        |                          |
|----------------------|-----|-----------------------------------------------------------------------------------------------------------------------------------------|-----------------------------------|---------------|-------|-------------------------------------------------------------------------------------------------|---------------------------------------------------------------|----------------------------------------|--------------------------|
|                      |     | (including postpartum depression service)                                                                                               |                                   |               |       |                                                                                                 |                                                               |                                        |                          |
| Egede (2015) [36]    | 241 | 1) Videoconferencing behavioral activation treatment<br>2) face-to-face behavioral activation treatment                                 | Stand-alone intervention          | 63.9 (5.1)    | 2     | MDD                                                                                             | 1) Videophone                                                 | 8 weeks / 8 sessions                   | 2) Behavioral activation |
| Flygare (2020) [37]  | 95  | 1) Internet-based CBT, 2) online psychoeducation control condition                                                                      | Stand-alone intervention          | 45.30 (12.20) | 75.80 | MDD (71.6%), dysthymia (9.5%), Depressive Disorder NOS (4.2%), MDD in partial remission (15.8%) | 1) Online intervention                                        | 8 weeks / 8 modules                    | 1) CBT                   |
| Forand (2018) [38]   | 90  | 1) Internet-based CBT<br>2) waiting list                                                                                                | Stand-alone intervention          | ND            | 75    | MDD (98%)                                                                                       | 1) Online Intervention, telephone (contacts with coaches)     | 8 weeks / 8 sessions                   | 1) CBT                   |
| Forsell (2017) [39]  | 42  | 1) Internet-based CBT plus antenatal TAU<br>2) antenatal TAU                                                                            | Enhanced stand-alone intervention | ND            | 100   | MDD                                                                                             | Online platform                                               | 10 weeks / 10 modules                  | CBT                      |
| Gilbody (2015)* [40] | 691 | 1) Internet-based CBT (Beating the Blues) plus usual GP care<br>2) internet-based CBT (MoodGYM) plus usual GP care)<br>3) usual GP care | Enhanced stand-alone intervention | 39.9 (12.7)   | 67    | MDD (81%)                                                                                       | 1), 2) Online intervention, telephone (for technical support) | 1) ND / 8 sessions, 2) ND / 5 sessions | 1), 2)                   |

|                      |     |                                                                                                                          |                                                                    |    |      |                                            |                              |                          |                                              |
|----------------------|-----|--------------------------------------------------------------------------------------------------------------------------|--------------------------------------------------------------------|----|------|--------------------------------------------|------------------------------|--------------------------|----------------------------------------------|
| Gili (2020) [41]     | 221 | 1) Online healthy lifestyle program, 2) online mindfulness program, 3) online positive affect promotion, 4) improved TAU | Enhanced stand-alone intervention                                  | ND | 77.8 | MDD or dysthymia                           | 1) & 2), Online intervention | 4 to 8 weeks / 4 modules | 1) Mindfulness, 2) Positive affect promotion |
| Graaf (2009)* [34]   | 303 | 1) Internet-based CBT plus TAU<br>2) internet-based CBT<br>3) TAU                                                        | 1)Enhanced stand-alone intervention<br>2) stand-alone intervention | ND | 56.8 | Recurrent MDD (36.30%), single MDD (43.6%) | 1), 2) Online intervention   | 1), 2) ND / 9 sessions   | 1), 2) CBT                                   |
| Hunkeler (2012) [43] | 103 | 1) Collaborative care website plus usual specialty mental health care<br>2) usual specialty mental health care           | Collaborative care approach                                        | ND | 79.6 | Recurrent MDD                              | 1) Online platform           | 52 weeks / ND            | CBT                                          |
| Hur (2018) [44]      | 48  | 1) App-based cognitive restructuring, 2) App-based mood chart control group                                              | Stand-alone intervention                                           | ND | 88.2 | Other specified depressive disorder        | 1) Online intervention       | 3 weeks / ND             | 1) CT (especially cognitive restructuring)   |
| Jannati (2020) [45]  | 78  | 1) App-based CBT, 2) waiting list                                                                                        | Stand-alone intervention                                           | ND | 100  | MDD (postpartum)                           | 1) Online intervention       | 8 weeks / 8 modules      | 1) CBT                                       |

|                         |     |                                                                                                                                           |                                   |             |      |                                                                                                 |                                                            |                                                     |                                                            |
|-------------------------|-----|-------------------------------------------------------------------------------------------------------------------------------------------|-----------------------------------|-------------|------|-------------------------------------------------------------------------------------------------|------------------------------------------------------------|-----------------------------------------------------|------------------------------------------------------------|
| Johansson (2012a) [48]  | 92  | 1) Internet-based psychodynamic treatment<br>2) structured support control group                                                          | Stand-alone intervention          | 45.6 (14.0) | 75   | Acute MDD (65.2%), partial remitted MDD (34.8%)                                                 | 1) Online intervention                                     | 10 weeks / 9 modules                                | Psychodynamic therapy                                      |
| Johansson (2012b)* [49] | 121 | 1) Tailored internet-based CBT<br>2) standardized internet-based CBT<br>3) participation in online discussion group during waiting period | Stand-alone intervention          | 44.7 (12.1) | 71.1 | Acute MDD (73.6%), partial remitted MDD (26.4%), dysthymia (14.0%)                              | 1), 2) Online Intervention                                 | 1) 10 weeks / 25 chapters, 2) 10 weeks / 8 chapters | 1), 2) CBT                                                 |
| Johansson (2013) [47]   | 100 | 1) Internet-based psychodynamic treatment<br>2) waiting list plus continuous contact with therapist                                       | Stand-alone intervention          | ND          | ND   | Depression and anxiety disorders, data are reported separately for the depressed subgroup (MDD) | 1) Online intervention<br>2) online contact to therapist   | 1) 10 weeks / 8 modules,<br>2) ND / ND              | 1) Psychodynamic therapy, 2) basic support from therapists |
| Johansson (2019) [46]   | 54  | 1) Internet-based CBT, 2) waiting list                                                                                                    | Stand-alone intervention          | ND          | 57.0 | Recurrent MDD (94%)                                                                             | 1) Online intervention                                     | 8 weeks / 8 modules                                 | 1) CBT                                                     |
| Kessler (2009)[50]      | 297 | 1) Online CBT plus usual GP care<br>2) usual GP care while on waitlist                                                                    | Enhanced stand-alone intervention | ND          | 68.0 | MDD (mild (5.1%), moderate (26.2%), severe (68.7%), based on BDI score)                         | Online intervention (with a therapist online in real time) | 16 weeks / 10 sessions                              | CBT                                                        |

|                      |     |                                                                                                                                        |                          |             |      |                                                                                |                                                                                                       |                                                              |                                                                            |
|----------------------|-----|----------------------------------------------------------------------------------------------------------------------------------------|--------------------------|-------------|------|--------------------------------------------------------------------------------|-------------------------------------------------------------------------------------------------------|--------------------------------------------------------------|----------------------------------------------------------------------------|
| Kivi (2014) [51]     | 92  | 1) Internet-based CBT<br>2) TAU                                                                                                        | Stand-alone intervention | 36.6 (11.3) | 66   | MDD (mild (19%), moderate (34%), severe (41%), based on BDI-II cut-off scores) | Online program, CD (containing mindfulness and acceptance instructions), telephone (contact to coach) | 12 weeks / 7 modules                                         | CBT (consisting of BA, Acceptance and Commitment Therapy, and Mindfulness) |
| Kooistra (2019) [52] | 103 | 1) Blended CBT, 2) f2f CBT                                                                                                             | Blended treatment        | ND          | 63.0 | MDD                                                                            | 1) Online intervention                                                                                | 10 weeks / 10 f2f sessions and 9 web-based sessions          | 1) CBT                                                                     |
| Hirsch* (2018) [42]  | 79  | 1) Online Cognitive Bias Modification with or, 2) without priming of repetitive negative thinking<br>3) Neutral task control condition | Stand-alone intervention | ND          | 78.5 | GAD or MDD (outcome data was reported separately)                              | Online platform                                                                                       | 3 weeks / 10 sessions                                        | CBM                                                                        |
| Lam (2013) [53]      | 105 | 1) Telephone CBT plus medication, 2) medication plus adherence reminder                                                                | Blended treatment        | ND          | 54.6 | Single MDD (33.33%), recurrent MDD (66.66%)                                    | 1) Telephone                                                                                          | 8 to 10 weeks CBT; 12 weeks escitalopram / 8 sessions of CBT | CBT                                                                        |
| Lang (2012) [54]     | 28  | 1) Imagery-focused cognitive Bias modification, 2) Control condition with same stimulus material, but with modified contingencies      | Stand-alone intervention | ND          | 76.9 | MDD                                                                            | Computer program                                                                                      | 1 weeks / 7 sessions                                         | Imagery-focused CBM                                                        |

|                         |     |                                                                                                                   |                                   |             |      |                                                                              |                                                                                                                                                                                                                       |                      |                                                                 |
|-------------------------|-----|-------------------------------------------------------------------------------------------------------------------|-----------------------------------|-------------|------|------------------------------------------------------------------------------|-----------------------------------------------------------------------------------------------------------------------------------------------------------------------------------------------------------------------|----------------------|-----------------------------------------------------------------|
| Lappalainen (2015) [55] | 39  | 1) Internet-based acceptance and commitment therapy<br>2) waiting list                                            | Stand-alone intervention          | 51.9 (12.9) | 71.8 | MDD (mild (25.6%), moderate (43.6%), severe (17.9%), based on BDI-II scores) | Online intervention                                                                                                                                                                                                   | 7 weeks / 6 modules  | Acceptance and commitment therapy                               |
| Lindner (2014) [56]     | 38  | 1) Self-help program plus telephone support by therapist<br>2) Self-help program plus e-mail support by therapist | Stand-alone intervention          | ND          | 84.2 | MDD (84.2%), MDD + Dysthymia (15.8%)                                         | 1) Online program, telephone (contact to therapist), CD-ROM (with mindfulness and acceptance instructions)<br>2) Online program, e-mail (contact to therapist), CD-ROM (with mindfulness and acceptance instructions) | 8 weeks / 7 modules  | BA (with some influence from acceptance and commitment therapy) |
| Löbner (2018) [57]      | 647 | 1) Online CBT plus TAU<br>2) TAU                                                                                  | Enhanced stand-alone intervention | ND          | 68.5 | MDD                                                                          | Online program                                                                                                                                                                                                        | ND / 5 modules       | CBT                                                             |
| Luxton (2016) [58]      | 121 | 1) In Home treatment<br>2) in-person treatment                                                                    | Stand-alone intervention          | ND          | 18.2 | MDD (9% suffered from minor depression)                                      | 1) Videoconferencing via laptop                                                                                                                                                                                       | 8 weeks / 8 sessions | BA                                                              |
| Ly (2014) [60]          | 84  | 1) Smartphone-based BA intervention<br>2) smartphone-based mindfulness intervention                               | Stand-alone intervention          | 36.1 (10.8) | 70   | MDD, MDD and Dysthymia (49%)                                                 | 1) Smartphone application<br>2) smartphone application                                                                                                                                                                | 8 weeks / 3 chapters | 1) BA, 2) Mindfulness practice programme                        |



|                     |     |                                                                                                                              |                                   |             |      |                                                                                              |                                                              |                                                                                                               |           |
|---------------------|-----|------------------------------------------------------------------------------------------------------------------------------|-----------------------------------|-------------|------|----------------------------------------------------------------------------------------------|--------------------------------------------------------------|---------------------------------------------------------------------------------------------------------------|-----------|
| Ly (2015) [59]      | 93  | 1) Blended treatment (face-to-session plus smartphone application that were used between the sessions)<br>2) Face-to-face BA | Blended treatment                 | 30.6 (11.4) | 69.9 | MDD                                                                                          | 1) Smartphone application                                    | 1) 9 weeks / 4 face-to-face sessions (smartphone app was used between sessions),<br>2) 10 weeks / 10 sessions | 1), 2) BA |
| Mantani (2017) [61] | 164 | 1) Smartphone CBT plus medication change<br>2) medication change alone                                                       | Blended treatment                 | ND          | 53.1 | MDD (with antidepressant resistance defined as scoring $\geq 10$ on the BDI-II)              | 1) Smartphone application                                    | 9 weeks / 8 sessions                                                                                          | CBT       |
| Meyer (2015) [62]   | 163 | 1) Internet-based CBT plus permission of using TAU, 2) TAU                                                                   | Enhanced stand-alone intervention | 42.0 (11.4) | 74.8 | MDD (37.2%), Dysthymia (10.4%), MDD and Dysthymia (39.3%), Neither MDD nor Dysthymia (12.9%) | 1) Online intervention plus daily text messages (optionally) | 13,05 weeks / ND                                                                                              | CBT       |
| Milgrom (2016) [63] | 43  | 1) Internet-based CBT<br>2) TAU                                                                                              | Stand-alone intervention          | ND          | 100  | Recurrent MDD (67.4%), single MDD (32.3%)                                                    | 1) Online intervention                                       | 8 weeks / 6 sessions                                                                                          | CBT       |
| Mohr (2011) [64]    | 85  | 1) Telephone CBT<br>2) TAU                                                                                                   | Stand-alone intervention          | 55.9 (10.6) | 9.4  | MDD                                                                                          | 1) Telephone                                                 | 20 weeks / 16 sessions                                                                                        | CBT       |

|                            |     |                                                                                                                                                          |                                   |            |      |     |                                                                                |                                                                                                                    |              |
|----------------------------|-----|----------------------------------------------------------------------------------------------------------------------------------------------------------|-----------------------------------|------------|------|-----|--------------------------------------------------------------------------------|--------------------------------------------------------------------------------------------------------------------|--------------|
| Mohr (2012) [66]           | 325 | 1) Face-to-face CBT<br>2) Telephone CBT                                                                                                                  | Stand-alone intervention          | ND         | 77.5 | MDD | 2) Telephone administered intervention                                         | 18 weeks / 18 sessions                                                                                             | CBT          |
| Mohr* (2013) [65]          | 102 | 1) Guided internet-based CBT<br>2) unguided internet-based CBT<br>3) waiting list                                                                        | Enhanced stand-alone intervention | ND         | 71.4 | MDD | 1) Online intervention, telephone (contact to coach)<br>2) online intervention | 1), 2) 12 weeks / 18 lessons                                                                                       | 1), 2) CBT   |
| Mohr (2019) [67]           | 312 | 1) Stepped care program (1st step iCBT, 2nd step telephone CBT),<br>2) telephone CBT alone                                                               | Stepped care approach             | ND         | 73.4 | MDD | 1) Online intervention, 2) telephone-delivered intervention                    | 1) & 2), duration of the treatment depended on treatment success, but treatment lasted up to a maximum of 20 weeks | 1) & 2), CBT |
| Montero-Marín* (2016) [68] | 296 | 1) Self-guided online program plus improved TAU<br>2) therapist-guided online program plus improved TAU<br>3) improved TAU                               | Blended treatment                 | 43.2 (9.3) | 79.2 | MDD | 1) Online intervention<br>2) online intervention                               | 1), 2): 13,05 weeks (estimated) / 10 module                                                                        | 1), 2) CBT   |
| Nakao (2018) [69]          | 40  | 1) Blended CBT plus continuation with TAU with their treating psychiatrist<br>2) waiting list and continuation with TAU with their treating psychiatrist | Blended treatment                 | 40.2 (9.7) | 50   | MDD | 1) Online program                                                              | 12 weeks / 5 core components                                                                                       | CBT          |

|                      |     |                                                                                                                                                                    |                                   |               |       |                                                                                 |                                          |                             |              |
|----------------------|-----|--------------------------------------------------------------------------------------------------------------------------------------------------------------------|-----------------------------------|---------------|-------|---------------------------------------------------------------------------------|------------------------------------------|-----------------------------|--------------|
| Nyström (2017)* [70] | 312 | 1) Physical activity without rationale<br>2) physical activity with rationale, 3) BA based on Lewinsohn's model<br>4) BA based on Martell's model, 5) waiting list | Stand-alone intervention          | 42.0 (13.5)   | 76    | MDD                                                                             | 3)-4) Online intervention                | 3)-4) 12 weeks / 8 sessions | 3)-4) BA     |
| Oehler (2020) [71]   | 348 | 1) Internet-based CBT, 2) progressive muscle relaxation control group                                                                                              | Stand-alone intervention          | ND            | 78.7  | Recurrent MDD (92.51%), single MDD (1.72%), dysthymia (23.92%)                  | 1) Online intervention                   | 6 weeks / 6 modules         | 1) CBT       |
| O'Mahen (2014) [72]  | 83  | 1) BA<br>2) TAU                                                                                                                                                    | Stand-alone intervention          | ND            | 100   | MDD                                                                             | 1) Online treatment, telephone (support) | ND / 12 sessions            | BA           |
| Perini (2009) [73]   | 48  | 1) Online CBT<br>2) waiting list                                                                                                                                   | Stand-alone intervention          | 49.3 (12.1)   | 77.8  | MDD                                                                             | 1) Online intervention                   | 8 weeks / 6 sessions        | CBT          |
| Pfeiffer (2020) [74] | 330 | 1) Peer-supported cCBT, 2) enhanced usual care                                                                                                                     | Enhanced stand-alone intervention | 51.6 (14.9)   | 20.0  | MDD                                                                             | 1) Online intervention                   | 13 weeks / 8 modules        | 1) CBT       |
| Pihlaja (2020) [75]  | 100 | 1) iCBT plus add-on telephone support, 2) iCBT only                                                                                                                | Stand-alone intervention          | 63.11 (11.10) | 66.00 | MDD                                                                             | 1) & 2), Online intervention             | ND / 7 modules              | 1) & 2), CBT |
| Reins (2019) [76]    | 131 | 1) Internet-based CBT<br>2) online psychoeducation                                                                                                                 | Stand-alone intervention          | 41.6 (10.8)   | 75.6  | MDD                                                                             | 1) Online intervention                   | ND / 6 sessions             | CBT          |
| Ren (2016) [77]      | 62  | 1) Internet-based CBT<br>2) waiting list                                                                                                                           | Stand-alone intervention          | ND            | ND    | MDD                                                                             | 1) Online intervention                   | 3 weeks / 5 sessions        | CBT          |
| Richards (2013) [79] | 581 | 1) Collaborative care intervention plus TAU<br>2) TAU                                                                                                              | Collaborative care approach       | 44.8 (13.3)   | 71.9  | MDD (mild (14.3%), moderate (55.6%), severe (29.9%), based on ICD-10 diagnosis) | 1) Telephone                             | 14 weeks / 6 to 12 contacts | BA           |

|                      |     |                                                                                                                                                                                |                             |             |      |                                                                                                             |                                                                                                                                 |                                |                                           |
|----------------------|-----|--------------------------------------------------------------------------------------------------------------------------------------------------------------------------------|-----------------------------|-------------|------|-------------------------------------------------------------------------------------------------------------|---------------------------------------------------------------------------------------------------------------------------------|--------------------------------|-------------------------------------------|
| Richards (2020) [78] | 169 | 1) Immediate iCBT (step 2 within a stepped care approach), 2) waiting list                                                                                                     | Stepped care approach       | ND          | ND   | MDD                                                                                                         | 1) Online intervention                                                                                                          | 8 weeks / ND                   | 1) CBT                                    |
| Rollman [80] (2018)  | 704 | 1) Internet-based CBT supported by collaborative care manager<br>2) Internet-based CBT supported by collaborative care manager plus access to internet support group<br>3) TAU | Collaborative care approach | 42.7 (14.3) | 79.8 | MDD (81.2%), generalized anxiety disorder (53.5%), panic disorder (15.8%), MDD and anxiety disorder (72.3%) | 1) Online intervention, telephone (for care managers contact)<br>2) Online intervention, telephone (for care managers contact), | 1), 2) 26.1 weeks / 8 sessions | 1),2) CBT                                 |
| Rosso (2017) [81]    | 77  | 1) Internet-based CBT<br>2) monitored attention control                                                                                                                        | Stand-alone intervention    | ND          | 68.8 | Recurrent MDD (74.0%), single MDD (26.0%)                                                                   | 1) Online intervention, telephone (for supporting contacts)                                                                     | 10 weeks / 6 lessons           | CBT                                       |
| Sandoval (2017) [82] | 45  | 1) Interactive media-based, computer-delivered depression treatment program<br>2) no treatment control condition                                                               | Stand-alone intervention    | ND          | 62.0 | MDD (95%), dysthymia (5%)                                                                                   | 1) Computer-delivered intervention (at study site)                                                                              | 6 weeks / 6 sessions           | PST                                       |
| Schuver (2016) [83]  | 40  | 1) Yoga intervention<br>2) walking control                                                                                                                                     | Stand-alone intervention    | 42.7 (4.95) | 100  | MDD                                                                                                         | DVD (for Yoga or walking, telephone (for contact to counsellors)                                                                | 12 weeks / 8 sessions          | Mindfulness-Bases Stress Reduction (MBSR) |

|                       |     |                                                                                                                  |                          |             |      |                                           |                                                                                  |                                                             |            |
|-----------------------|-----|------------------------------------------------------------------------------------------------------------------|--------------------------|-------------|------|-------------------------------------------|----------------------------------------------------------------------------------|-------------------------------------------------------------|------------|
| Selmi (1990) [84]     | 36  | 1) Computer-administered therapy<br>2) therapist-administered therapy<br>3) waiting list                         | Stand-alone intervention | 28.2 (5.0)  | 63.9 | recurrent MDD (19.44%), single MDD (80.6) | 1) Computer-delivered intervention (at study site)                               | 6 weeks / 6 sessions                                        | CBT        |
| Smith (2017) [85]     | 270 | 1) Internet-based CBT, 2) self-help book (CBT), 3) self-help book (meditation), 4) waiting list                  | Stand-alone intervention | ND          | 81.9 | MDD                                       | 1) Online intervention, optional email/telephone contact to technician/clinician | 12 weeks / 6 modules                                        | CBT        |
| Steinmann (2020) [86] | 59  | 1) Telephone CBT with reminding letters<br>2) telephone CBT without reminding letters                            | Stand-alone intervention | 45.5 (13.6) | 72   | MDD                                       | 1) Telephone-delivered<br>2) telephone delivered                                 | 9 to 13 weeks / at least 9 sessions                         | CBT        |
| Thase (2018) [87]     | 154 | 1) Blended CBT treatment<br>2) face-to-face CBT                                                                  | Blended treatment        | 46.3 (14.3) | 66.2 | MDD                                       | 1) Online intervention                                                           | 16 weeks / 9 modules (online) plus 12 face-to-face sessions | CBT        |
| Titov (2010)* [88]    | 141 | 1) Internet-based CBT plus technician support<br>2) Internet-based CBT plus clinician support<br>3) waiting list | Stand-alone intervention | 43.0 (12.9) | 74   | MDD                                       | 1), 2) Online intervention, telephone (for clinician/technician contact)         | 1), 2) 8 weeks / 6 lessons                                  | 1), 2) CBT |

|                       |     |                                                                                      |                                   |             |      |                                                                                    |                                                                                                    |                             |            |
|-----------------------|-----|--------------------------------------------------------------------------------------|-----------------------------------|-------------|------|------------------------------------------------------------------------------------|----------------------------------------------------------------------------------------------------|-----------------------------|------------|
| Titov (2011) [89]     | 77  | 1) Internet-based CBT<br>2) waiting list                                             | Stand-alone intervention          | 43.9 (14.6) | 73   | MDD (51%) (results for depression subgroup reported separately)                    | 1) Online intervention, contact to clinician via instant messaging or telephone                    | 10 weeks / 8 modules        | CBT        |
| Torkan (2014) [90]    | 39  | 1) Positive imagery cognitive bias modification,<br>2) non-imagery control condition | Stand-alone intervention          | ND          | 64.1 | MDD                                                                                | 1), 2) Computer-delivered intervention                                                             | 1 week / 7 sessions         | 1) CBM     |
| Vernmark (2010)* [91] | 88  | 1) Email therapy,<br>2) internet-based, CBT<br>3) waiting list                       | Stand-alone intervention          | 36.8 (12.9) | 68.2 | MDD                                                                                | 1), 2) Online Intervention                                                                         | 1), 2) 8 weeks / 8 modules  | 1), 2) CBT |
| Watkins (2012) [92]   | 121 | 1) Cognitive bias modification plus TAU<br>2) relaxation training plus TAU<br>3) TAU | Enhanced stand-alone intervention | ND          | 71.9 | MDD                                                                                | 1)CD-ROM (with exercises), telephone                                                               | 8 weeks / ND                | CBM        |
| Watts (2013) [93]     | 52  | 1) Mobile-based intervention (via an application)<br>2) computer-based intervention  | Stand-alone intervention          | 41.0 (12.4) | 80   | MDD (mild (50%), moderate (23.5%), severe (14.7%), based on PHQ-9 severity Status) | 1) Access to intervention via app (mobile phone or iPad)<br>2) Access to intervention via computer | 1), 2) 8 weeks / 6 sessions | 1), 2) CBT |

|                      |     |                                                                                                                                                     |                          |               |       |     |                                                          |                                                                     |                                          |
|----------------------|-----|-----------------------------------------------------------------------------------------------------------------------------------------------------|--------------------------|---------------|-------|-----|----------------------------------------------------------|---------------------------------------------------------------------|------------------------------------------|
| Welch (2019) [94]    | 14  | 1) eCBT plus transcranial direct current stimulation, 2) eCBT plus sham stimulation                                                                 | Stand-alone intervention | 53.21 (12.48) | 85.71 | MDD | 1) & 2), Computer-delivered intervention (at study site) | 1) & 2), 4 weeks / ND                                               | 1) & 2), CBT                             |
| Williams (2013) [95] | 69  | 1) imagery-focused cognitive bias modification plus internet-based CBT<br>2) waiting list                                                           | Stand-alone intervention | ND            | 76.2  | MDD | 1) Online interventions (CBM, CBT)                       | 11 weeks / 7 CBM sessions plus 6 CBT sessions                       | 1) CBM, CBT                              |
| Williams (2015) [96] | 121 | 1) Positive imagery cognitive bias modification plus internet-based CBT<br>2) control cognitive bias modification condition plus internet-based CBT | Stand-alone intervention | ND            | 73.3  | MDD | 1), 2) Online interventions (CBM, CBT)                   | 1), 2) 11 weeks / 7 active/control CBM sessions plus 6 CBT sessions | 1) CBM plus CBT, 2) control CBM plus CBT |

|                       |      |                                                                                                                                                                                 |                          |             |      |                                                                                                                                                         |                                                    |                                                                              |                               |
|-----------------------|------|---------------------------------------------------------------------------------------------------------------------------------------------------------------------------------|--------------------------|-------------|------|---------------------------------------------------------------------------------------------------------------------------------------------------------|----------------------------------------------------|------------------------------------------------------------------------------|-------------------------------|
| Wright (2005) [97]    | 45   | 1) Blended cognitive therapy<br>2) face-to-face cognitive therapy,<br>3) waiting list                                                                                           | Blended treatment        | ND          | 75.6 | single MDD                                                                                                                                              | 1) Computer-delivered intervention (at study site) | 8 weeks / 9 face-to-face session followed immediately by 8 computer sessions | 1) Cognitive therapy (or CBT) |
| Zagorscak (2018) [98] | 1089 | 1) Internet-based CBT plus standardized, automated feedback and contact on demand<br>2) internet-based CBT plus semi-standardized e-mail feedback                               | Stand-alone intervention | 45.7 (11.3) | 65.6 | Single MDD (42.1%), remitted MDD (26.2%), dysthymia (8.3%), double depression (5.3%), Bipolar or NOS (6.0%), no current/past affective disorder (12.2%) | 1), 2) Online intervention                         | 6 weeks / 7 modules                                                          | 1) ,2) CBT                    |
| Zwerenz [99] (2017)   | 611  | 1) Blended treatment (inpatient face-to-face sessions plus internet-based CBT), 2) Active control group (inpatient face-to-face sessions plus online information on depression) | Blended treatment        | 48.0 (9.8)  | 60.7 | Recurrent MDD (65.9%), single MDD (31.9), depression severity: mild (0.01%), moderate (79.9%), severe (16.6%) according to ICD-10 classification.       | 1) Online intervention                             | 12 weeks / 12 modules                                                        | 1) CBT                        |

**Note.** \* = Study arms were summarized for meta-analysis. N = Number of participants randomized; M = Mean; SD = Standard deviation; MDD = Major depressive disorder; ND = No data; PHQ-9 = Patient Health Questionnaire 9 item; BDI = Beck Depression Inventory; CBT = Cognitive behavioral therapy; iCBT = Internet-based cognitive behavioral therapy; TAU = treatment as usual; NOS = Not otherwise specified; GP = General practitioner; GAD = Generalized anxiety disorder; BA = behavioral activation; f2f = face-to-face; CBM = Cognitive bias modification; TAU = Treatment as usual; PP = Positive psychology; CF = Cognition focused; CT = Cognitive therapy; PA = physical activity; PST = Problem solving therapy.
