# Supplementary material for: Effectiveness and Acceptance of Technology-Based Psychological Interventions for the Acute Treatment of Unipolar Depression: Systematic Review and Meta-analysis
Source: PubMed Central journal article supplement (PMC8386371; doi:10.2196/24584), 2021-06-13
Supplement: jmir_v23i6e24584_app4.pdf [file jmir_v23i6e24584_app4.pdf]

**Appendix 4.** Risk of bias ratings of included studies.

| Studies               | Random sequence generation (selection bias) | Allocation concealment (selection bias) | Blinding of participants and personnel (performance bias) | Blinding of outcome assessment (detection bias) | Incomplete outcome data (attrition bias) | Selective reporting (reporting bias) | Other bias |
|-----------------------|---------------------------------------------|-----------------------------------------|-----------------------------------------------------------|-------------------------------------------------|------------------------------------------|--------------------------------------|------------|
| Agyapong 2017 [22]    | +                                           | +                                       | -                                                         | +                                               | +                                        | ?                                    | +          |
| Andersson 2013 [23]   | +                                           | +                                       | -                                                         | ?                                               | +                                        | ?                                    | -          |
| Arjadi 2018 [24]      | +                                           | +                                       | +                                                         | -                                               | ?                                        | +                                    | +          |
| Berger 2011 [25]      | +                                           | +                                       | -                                                         | +                                               | +                                        | ?                                    | -          |
| Berger 2018 [26]      | +                                           | +                                       | -                                                         | +                                               | ?                                        | -                                    | -          |
| Blackwell 2015 [27]   | +                                           | +                                       | +                                                         | +                                               | +                                        | -                                    | +          |
| Bowers 1993 [28]      | ?                                           | ?                                       | -                                                         | +                                               | -                                        | ?                                    | -          |
| Carlbring 2013 [29]   | +                                           | +                                       | -                                                         | +                                               | +                                        | ?                                    | -          |
| Celano 2017 [30]      | +                                           | +                                       | -                                                         | +                                               | +                                        | +                                    | +          |
| Choi 2012 [31]        | +                                           | +                                       | -                                                         | ?                                               | +                                        | +                                    | +          |
| Choi 2014 [32]        | +                                           | +                                       | -                                                         | -                                               | +                                        | ?                                    | -          |
| Corruble 2016 [33]    | +                                           | +                                       | -                                                         | ?                                               | ?                                        | ?                                    | ?          |
| Dennis 2020 [35]      | +                                           | +                                       | -                                                         | +                                               | +                                        | ?                                    | -          |
| Egede 2015 [36]       | +                                           | +                                       | -                                                         | +                                               | +                                        | +                                    | +          |
| Flygare 2020 [37]     | +                                           | +                                       | -                                                         | +                                               | ?                                        | ?                                    | +          |
| Forand 2018 [38]      | +                                           | +                                       | -                                                         | -                                               | -                                        | -                                    | -          |
| Forsell 2017 [39]     | +                                           | +                                       | -                                                         | -                                               | +                                        | -                                    | -          |
| Gilbody 2015 [40]     | +                                           | +                                       | -                                                         | +                                               | +                                        | +                                    | ?          |
| Gili 2020 [41]        | +                                           | +                                       | -                                                         | +                                               | -                                        | -                                    | -          |
| Graaf 2009 [34]       | +                                           | +                                       | -                                                         | +                                               | +                                        | -                                    | -          |
| Hirsch 2018 [42]      | +                                           | +                                       | ?                                                         | +                                               | -                                        | +                                    | +          |
| Hunkeler 2012 [43]    | +                                           | +                                       | -                                                         | +                                               | +                                        | ?                                    | +          |
| Hur 2018 [44]         | +                                           | +                                       | -                                                         | +                                               | -                                        | ?                                    | +          |
| Jannati 2020 [45]     | +                                           | +                                       | -                                                         | +                                               | +                                        | +                                    | ?          |
| Johansson 2012a [48]  | +                                           | +                                       | -                                                         | -                                               | +                                        | -                                    | +          |
| Johansson 2012b [49]  | +                                           | +                                       | -                                                         | +                                               | +                                        | -                                    | +          |
| Johansson 2013 [47]   | +                                           | +                                       | -                                                         | ?                                               | +                                        | ?                                    | +          |
| Johansson 2019 [46]   | +                                           | +                                       | -                                                         | +                                               | ?                                        | ?                                    | ?          |
| Kessler 2009 [50]     | +                                           | +                                       | -                                                         | +                                               | +                                        | ?                                    | -          |
| Kivi 2014 [51]        | +                                           | +                                       | -                                                         | +                                               | -                                        | ?                                    | -          |
| Kooistra 2019 [52]    | +                                           | +                                       | -                                                         | +                                               | +                                        | +                                    | +          |
| Lam 2013 [53]         | +                                           | +                                       | -                                                         | +                                               | +                                        | -                                    | -          |
| Lang 2012 [54]        | +                                           | ?                                       | ?                                                         | -                                               | ?                                        | ?                                    | +          |
| Lappalainen 2015 [55] | +                                           | +                                       | -                                                         | +                                               | +                                        | ?                                    | +          |
| Lindner 2014 [56]     | +                                           | ?                                       | -                                                         | +                                               | +                                        | ?                                    | ?          |
| Löbner 2018 [57]      | +                                           | +                                       | -                                                         | +                                               | ?                                        | ?                                    | -          |
| Luxton 2016 [58]      | +                                           | ?                                       | -                                                         | +                                               | +                                        | +                                    | +          |
| Ly 2014 [60]          | +                                           | +                                       | -                                                         | +                                               | +                                        | -                                    | +          |

|                         |   |   |   |   |   |   |   |
|-------------------------|---|---|---|---|---|---|---|
| Ly 2015 [59]            | + | + | - | + | + | - | - |
| Mantani 2017 [61]       | + | + | - | + | + | - | + |
| Meyer 2015 [62]         | + | + | - | + | + | ? | - |
| Milgrom 2016 [63]       | + | + | - | + | + | ? | + |
| Mohr 2011 [64]          | ? | ? | - | + | + | + | + |
| Mohr 2012 [65]          | + | + | - | + | + | - | + |
| Mohr 2013 [66]          | + | + | - | + | + | ? | + |
| Mohr 2019 [67]          | + | + | - | + | + | ? | ? |
| Montero-Marín 2016 [68] | + | + | - | + | + | + | + |
| Nakao 2018 [69]         | + | + | - | + | + | + | ? |
| Nyström 2017 [70]       | + | + | - | + | ? | - | + |
| Oehler 2020 [71]        | + | + | - | + | + | + | - |
| O'Mahen 2014 [72]       | + | + | - | + | + | ? | + |
| Perini 2009 [73]        | + | ? | - | + | + | - | + |
| Pfeiffer 2020 [74]      | + | + | - | + | + | + | + |
| Pihlaja 2020 [75]       | ? | ? | - | + | + | ? | ? |
| Reins 2019 [76]         | + | + | - | ? | + | - | - |
| Ren 2016 [77]           | + | ? | - | + | + | ? | ? |
| Richards 2013 [79]      | + | + | - | + | + | - | - |
| Richards 2020 [78]      | + | + | - | ? | + | - | - |
| Rollman 2018 [80]       | + | + | - | + | + | - | + |
| Rosso 2017 [81]         | + | + | - | + | + | - | - |
| Sandoval 2017 [82]      | + | ? | - | + | + | ? | ? |
| Schuver 2016 [83]       | + | ? | - | + | - | - | + |
| Selmi 1990 [84]         | ? | ? | - | + | + | ? | - |
| Smith 2017 [85]         | + | + | - | - | + | - | ? |
| Steinmann 2020 [86]     | + | + | - | + | + | - | + |
| Thase 2018 [87]         | + | + | - | + | + | ? | ? |
| Titov 2010 [88]         | + | ? | - | ? | + | - | + |
| Titov 2011 [89]         | + | - | - | - | + | - | + |
| Torkan 2014 [90]        | ? | ? | - | + | - | ? | + |
| Vernmark 2010 [91]      | + | + | - | + | + | ? | + |
| Watkins 2012 [92]       | + | + | - | + | + | - | + |
| Watts 2013 [93]         | + | + | - | + | - | ? | + |
| Welch 2019 [94]         | ? | ? | + | + | ? | ? | + |
| Williams 2013 [95]      | + | + | - | + | + | ? | + |
| Williams 2015 [96]      | + | + | + | + | + | ? | + |
| Wright 2005 [97]        | ? | ? | - | + | ? | ? | ? |
| Zagorscak 2018 [98]     | + | + | - | + | + | ? | + |
| Zwerenz 2017 [99]       | + | + | - | + | + | + | ? |

|   |              |
|---|--------------|
| + | low risk     |
| ? | unclear risk |
| - | high risk    |
