# Supplementary material for: Effectiveness and Acceptance of Technology-Based Psychological Interventions for the Acute Treatment of Unipolar Depression: Systematic Review and Meta-analysis
Source: PubMed Central journal article supplement (PMC8386371; doi:10.2196/24584), 2021-06-13

**Appendix 5.** Funnel plots for different comparisons for post-treatment depression severity.

a) TBI. vs. treatment as usual

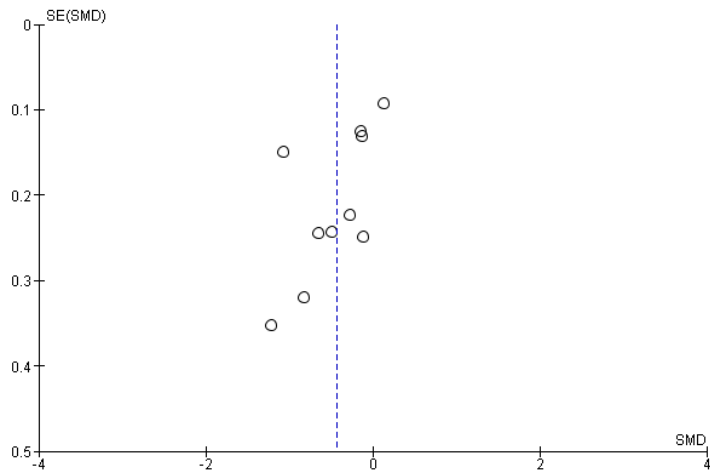

b) TBI vs. attention placebo

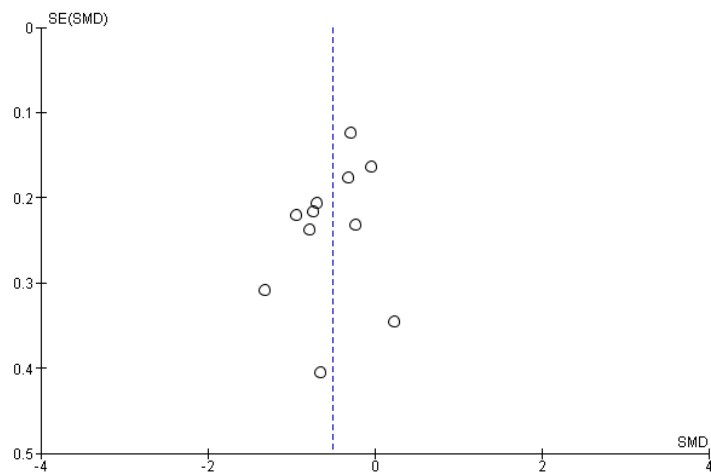

c) TBI vs. waiting list

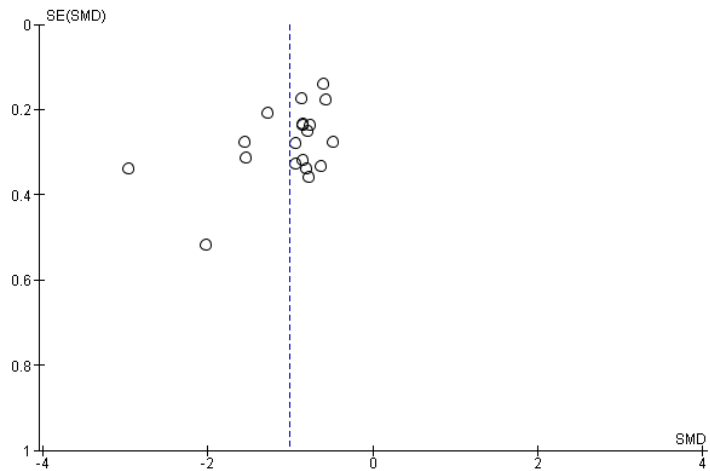

Supplement: jmir_v23i6e24584_app5.pdf [file jmir_v23i6e24584_app5.pdf]
